# Supplementary material for: Serum B-cell maturation antigen: a novel biomarker to predict outcomes for multiple myeloma patients
Source: PubMed Central journal article supplement — Haematologica. 2016 Dec 29;102(4):785–95. doi: 10.3324/haematol.2016.150896 (PMC5395119; doi:10.3324/haematol.2016.150896), 2017-04
Supplement: 2016_150896-Disclosures_and_Contributions.pdf [file 2016_150896-Disclosures_and_Contributions.pdf]

Haematologica  
HAEMATOL/2016/150896  
Version 4

Serum B-cell maturation antigen: a novel biomarker to predict  
outcomes for multiple myeloma patients

Michael Ghermezi, Mingjie Li, Suzie Vardanyan, Nika Manik  
Harutyunyan, Jillian Gottlieb, Ariana Berenson, Tanya M. Spektor,  
Claudia Andreu-Vieyra, Sophia Petraki, Eric Sanchez, Kyle Udd, Cathy  
S. Wang, Regina A. Swift, Haiming Chen, and James R Berenson

Disclosures: Dr. Berenson is a director, employee and shareholder in OncoTracker, Inc. a company that is involved in the development of BCMA as a marker. Haiming Chen, Eric Sanchez, Mingjie Li, and Cathy Wang are shareholders in OncoTracker, Inc.

Contributions: MG,ML,SV, NMH, JG, AB, ES,CSW,HC performed research, KU and TMS performed data analysis, TMS, SP, CAV and JRB wrote the manuscript. RAS and JRB supervised the study.
